# Supplementary material
Source: HighWire-hosted journal article supplement (http://www.qdcxjkg.com/highwire/filestream/113423/field_highwire_adjunct_files/0/ERJ-00369-2012_Disclosures.pdf)
Supplement: ERJ-00369-2012_Disclosures.pdf [file ERJ-00369-2012_Disclosures.pdf]

R.W.M. Leung received grants from Physiotherapy Research Foundation and Ian Collier Memorial Scholarship to run the study; received travel funds from the University of Sydney to attend the Asian Pacific Society of Respiriology.
